# Supplementary material for: Enhanced Luminescence of Yb3+ Ions Implanted to ZnO through the Selection of Optimal Implantation and Annealing Conditions
Source: MDPI journal article supplement (doi:10.3390/ma16051756), 2023-02-21
Supplement: s1 [file s1]

**Figure S1. SEM imaging of the surface morphology with a variety of magnifications and operating voltage for ZnO implanted at 800 °C with 150 keV Yb ions to the fluence of  $1 \times 10^{15} / \text{cm}^2$**

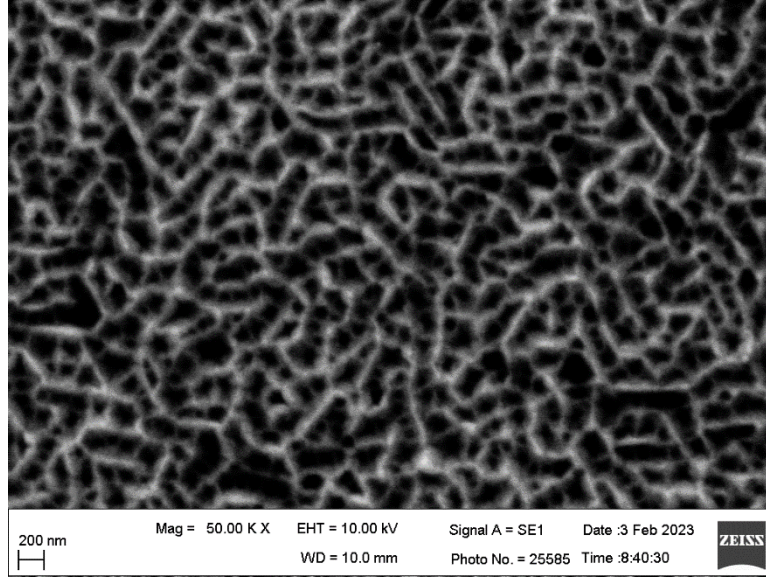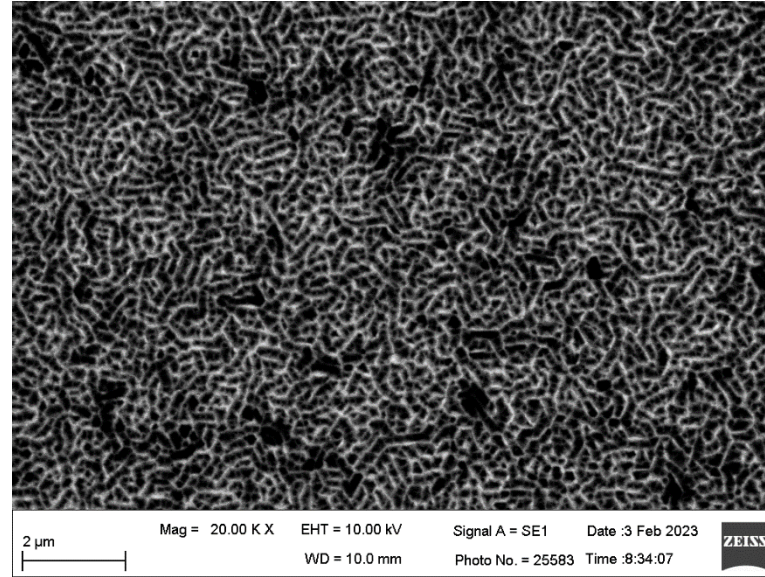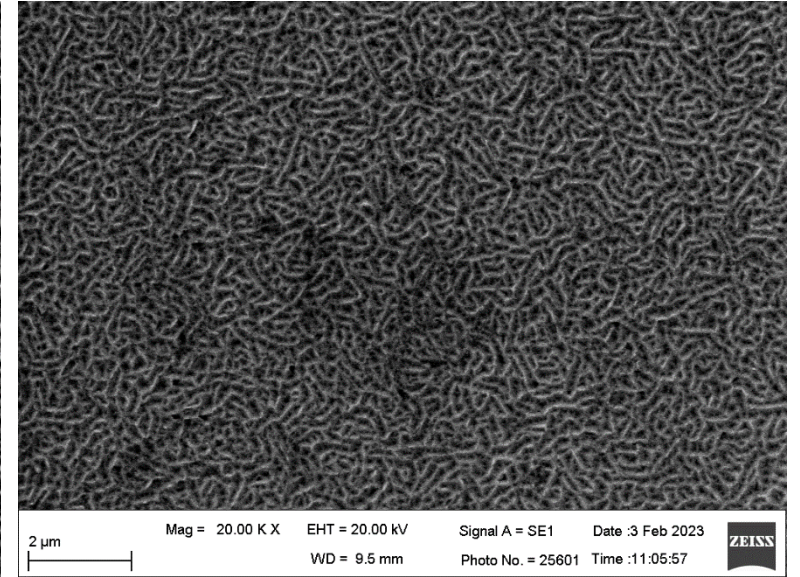



**Figure S2. EDS mapping with a variety of magnifications and operating voltage for ZnO implanted at 800 °C with 150 keV Yb ions to the fluence of  $1 \times 10^{15} / \text{cm}^2$**

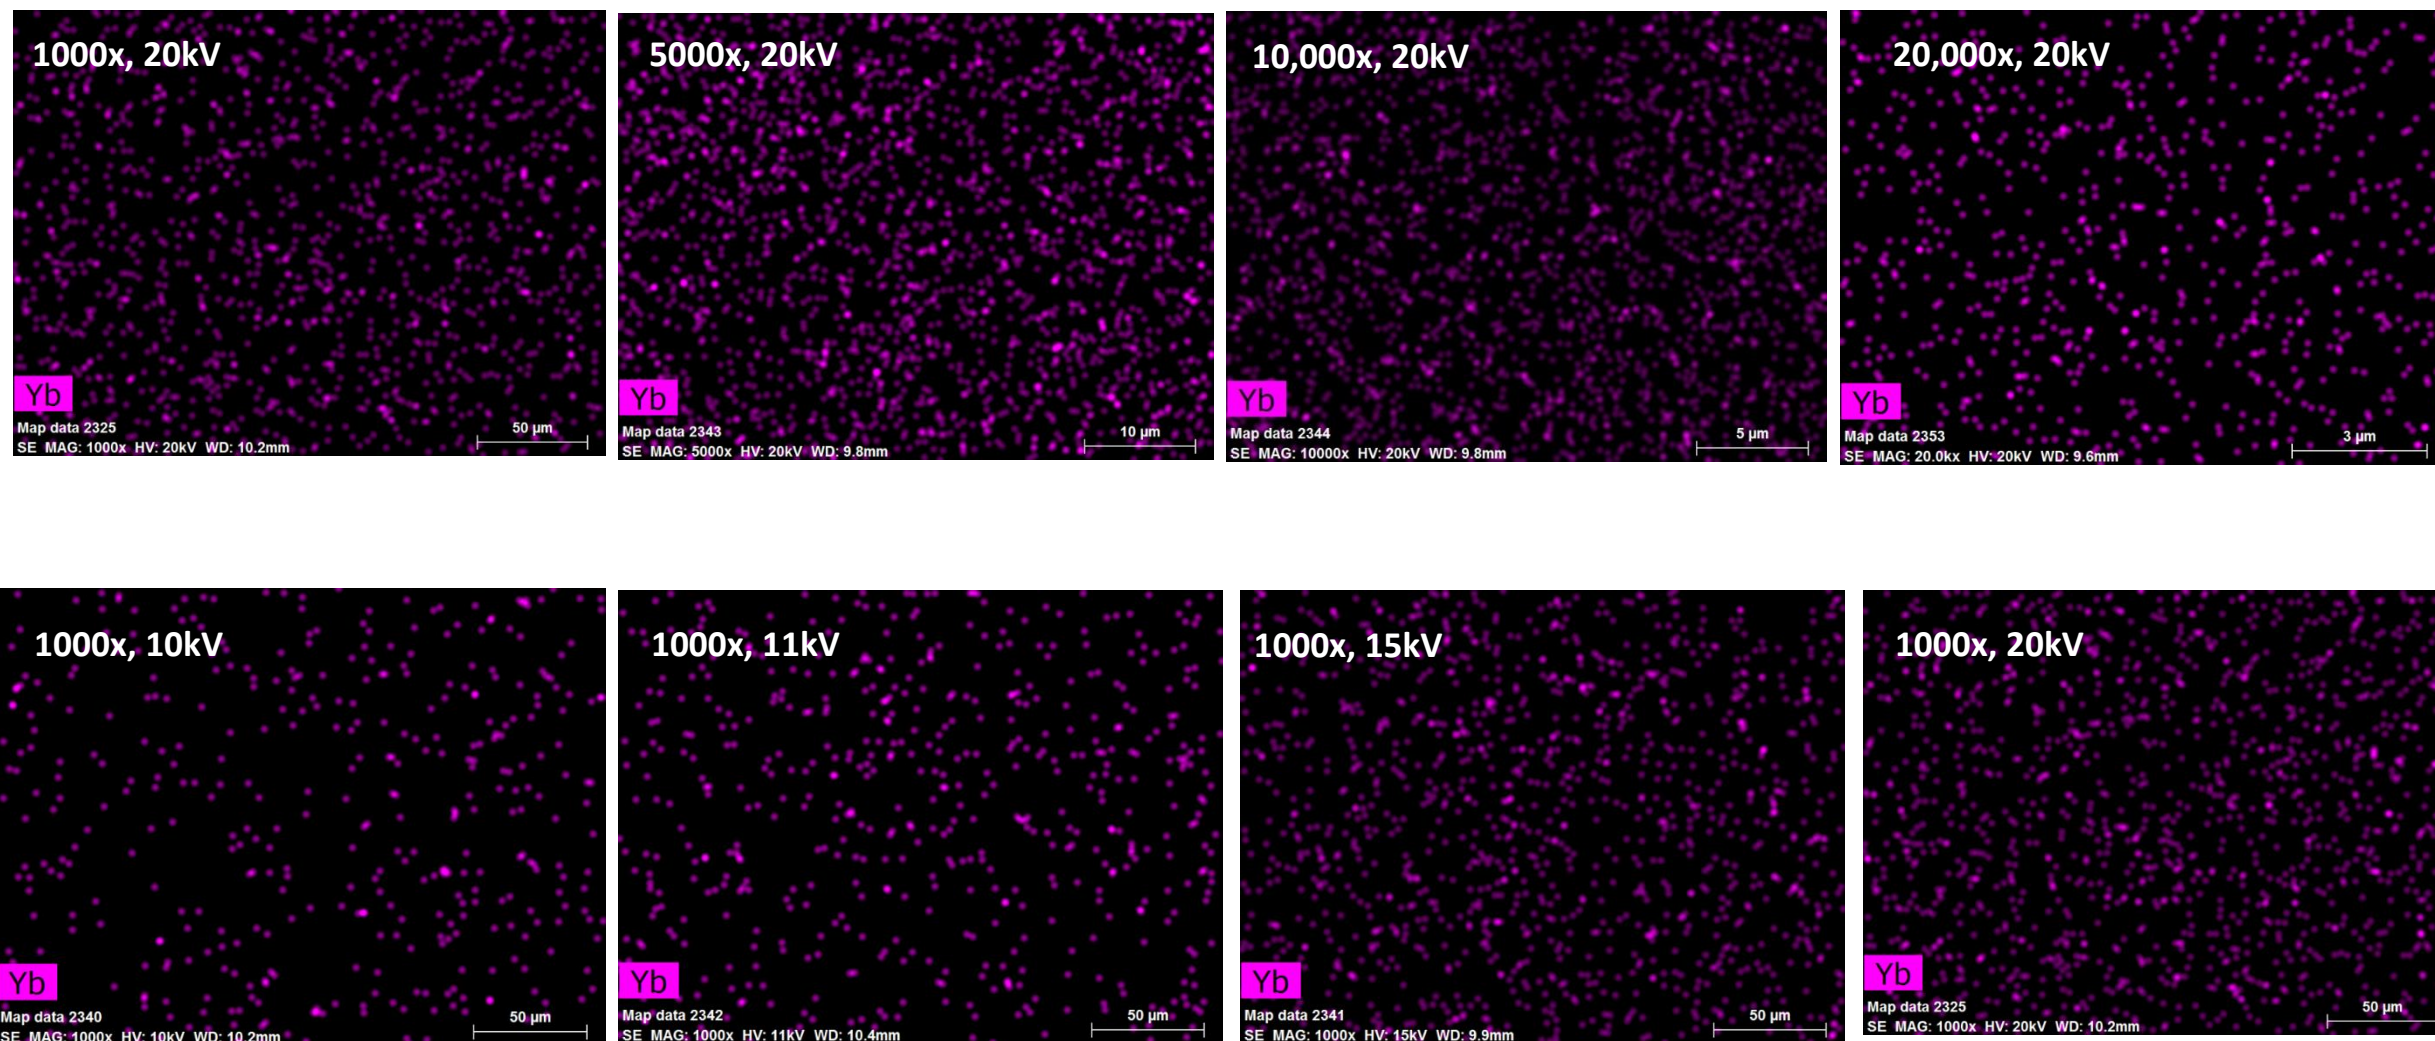



**Figure S3. SEM imaging of the surface morphology for ZnO implanted with 150 keV Yb ions to the fluence of  $1 \times 10^{15} / \text{cm}^2$  at different temperatures: 600 and 800 °C and RT and subsequently RTA-annealed for 10min at 800 °C in an oxygen atmosphere**

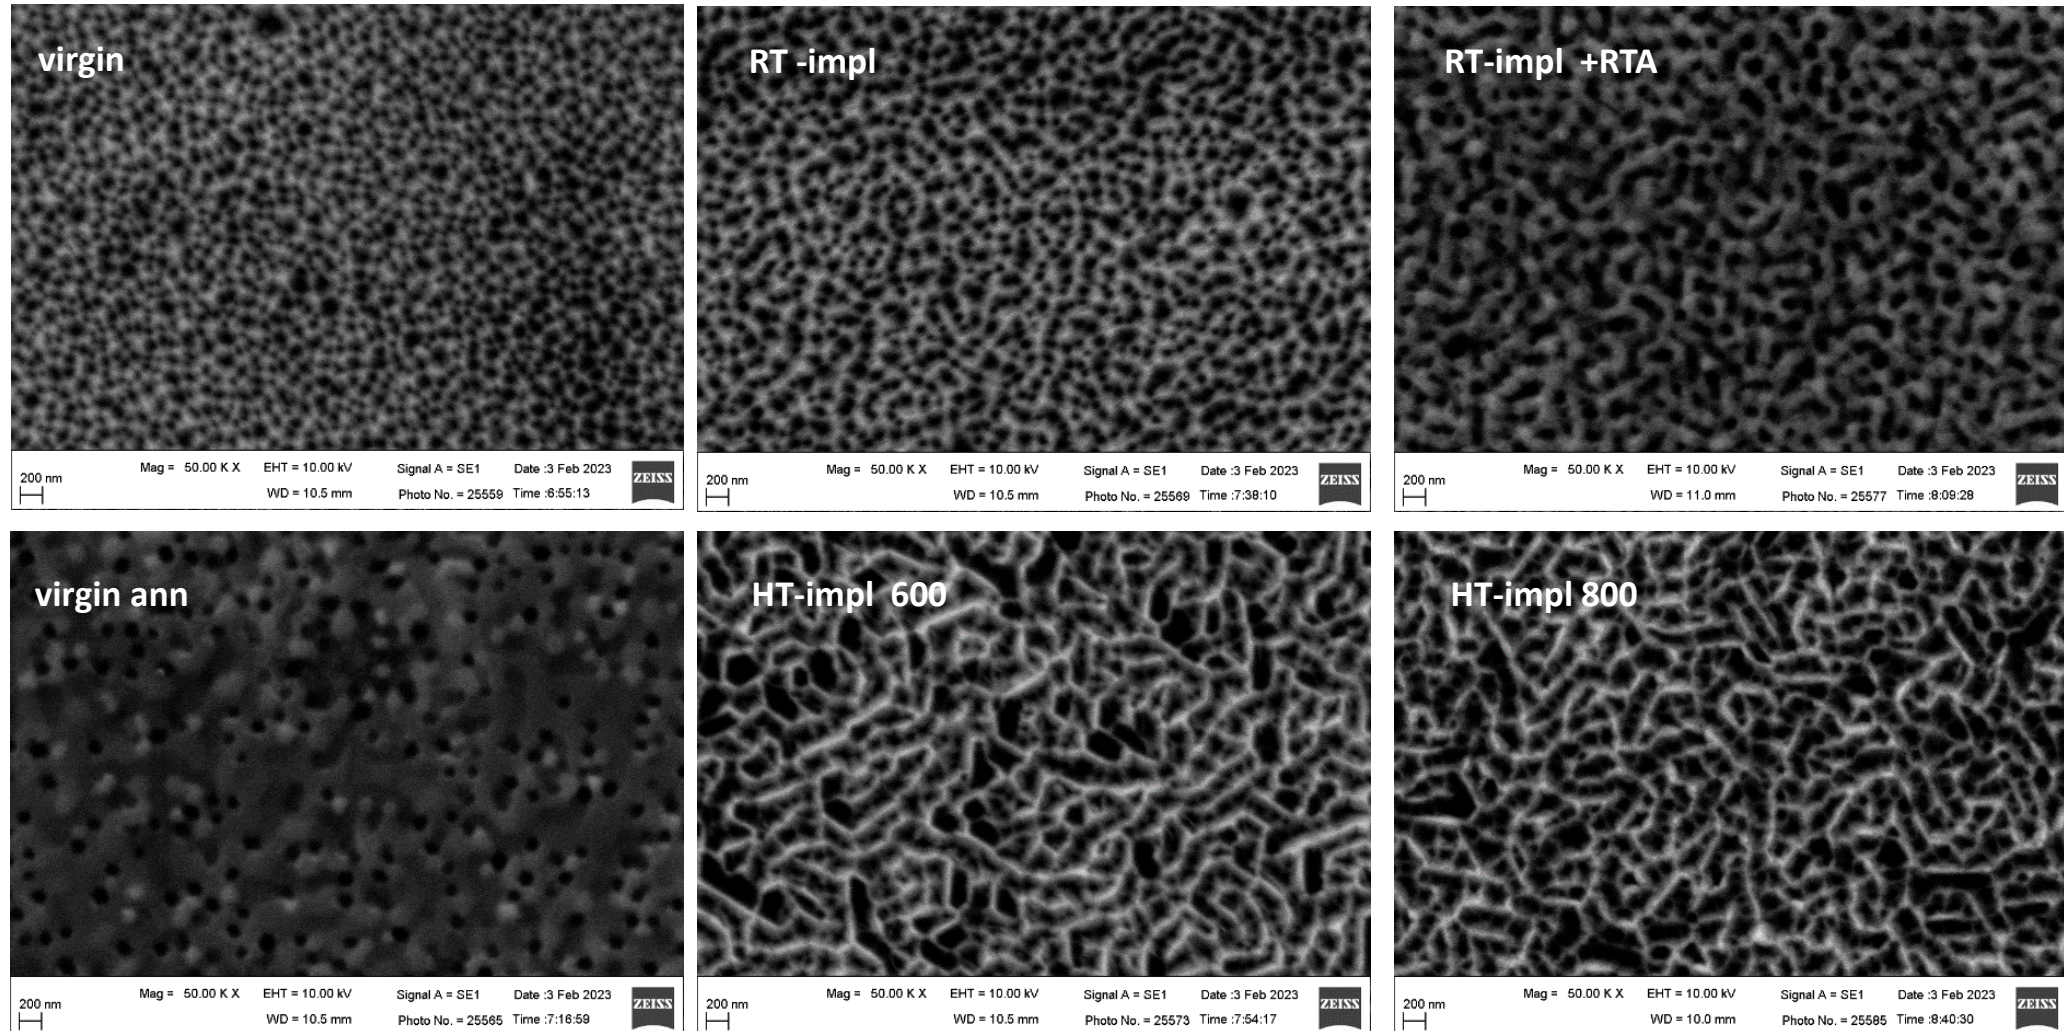



**Figure S4. AFM imaging of the surface morphology for ZnO implanted with 150 keV Yb ions to the fluence of  $1 \times 10^{15} / \text{cm}^2$  at different temperatures: 600 and 800 °C and RT and subsequently RTA-annealed for 10min at 800 °C in an oxygen atmosphere**

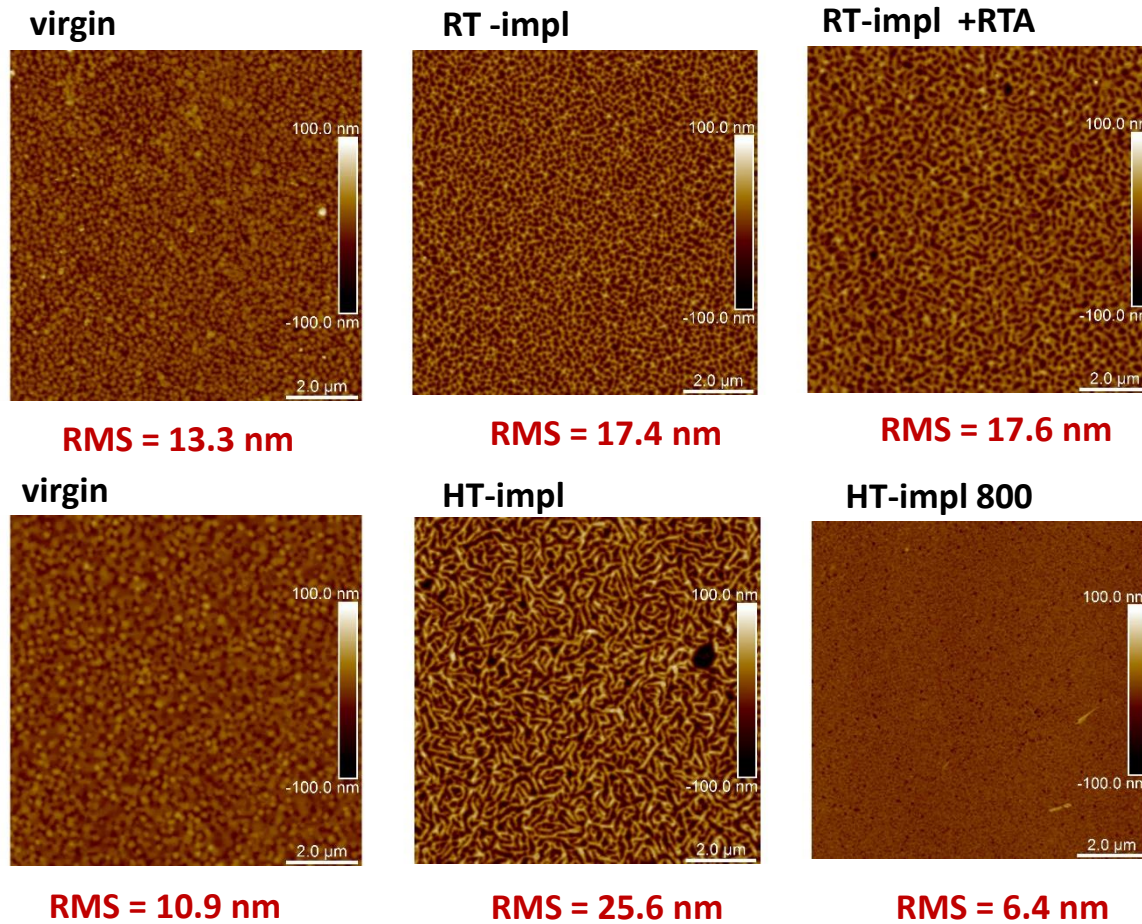

**Figure S5. AFM imaging of the surface morphology for ZnO implanted with 150 keV Yb ions to the fluence  $1 \times 10^{15} / \text{cm}^2$  and subsequently RTA-annealed for 10min at 800 °C in different atmospheres  $\text{N}_2$ , Ar,  $\text{O}_2$ .**

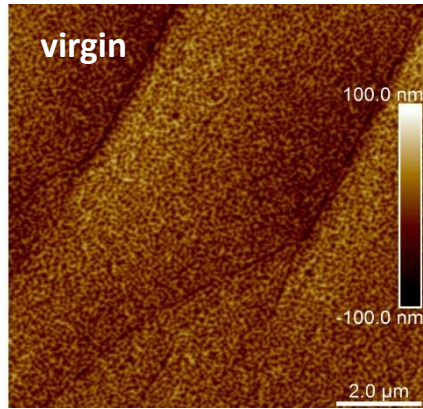

**RMS = 18.3 nm**

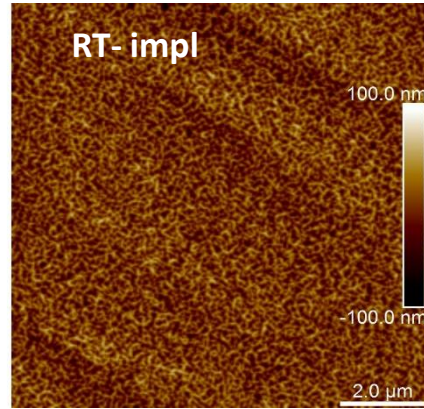

**RMS = 18.9 nm**

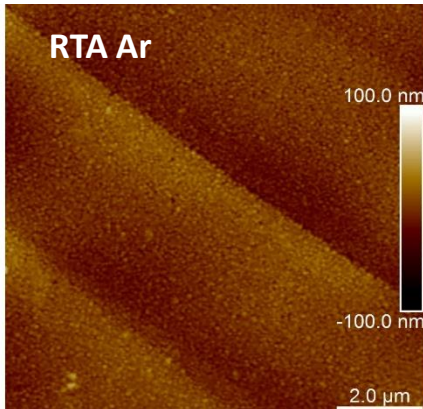

**RMS = 11.3 nm**

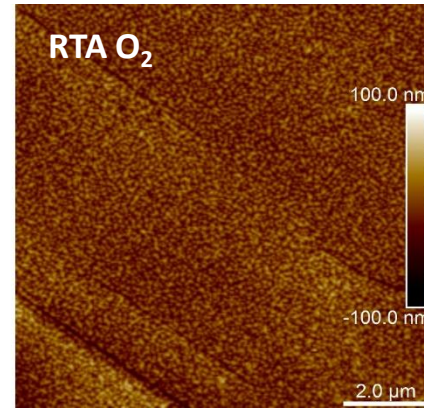

**RMS = 14.4 nm**

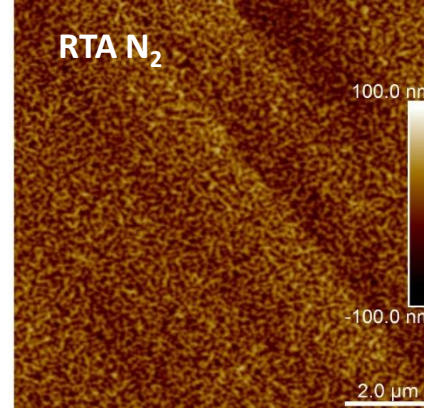

**RMS = 17.8 nm**
